# Supplementary material for: Characterization of Mycelium Biocomposites under Simulated Weathering Conditions
Source: PubMed Central journal article supplement — ACS Appl Bio Mater. 2024 Nov 26;7(12):8408–22. doi: 10.1021/acsabm.4c01192 (PMC11653254; doi:10.1021/acsabm.4c01192), 2024-11-26
Supplement: mt4c01192_si_001.pdf [file mt4c01192_si_001.pdf]

## Supporting Information

### Characterization of Mycelium Biocomposites Under Simulated Weathering Conditions

*Nicholas Schultz,<sup>a</sup> Ajimahl Fazli,<sup>a,b</sup> Sharmaine Piros,<sup>a</sup> Yuritzi Barranco-Origel <sup>a</sup> and Patricia DeLa Cruz<sup>b</sup>*

*Corresponding Author: Dr. Yanika Schneider\* <sup>a,b</sup>*

E-mail: [yanika.schneider@sjsu.edu](mailto:yanika.schneider@sjsu.edu)

- a) Department of Chemical and Materials Engineering,  
San José State University  
One Washington Square  
San Jose, CA 95192
  
- b) Eurofins EAG Laboratories  
810 Kifer Rd.  
Sunnyvale, CA 94086

| Magnification | Sample ID                                                                            |
|---------------|--------------------------------------------------------------------------------------|
|               | Control                                                                              |
| 180x          | 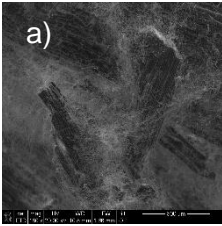   |
| 700x          |   |
| 1000x         |  |
| 2400x         |  |

**Figure S1.** Sem images of the mycelium biocomposite control at various magnifications. a) 180x b) 700x c) 1000x d) 2400x

| Magnification | Sample ID                                                                           |                                                                                     |                                                                                      |                                                                                       |
|---------------|-------------------------------------------------------------------------------------|-------------------------------------------------------------------------------------|--------------------------------------------------------------------------------------|---------------------------------------------------------------------------------------|
|               | Hot Dry                                                                             | Hot Humid                                                                           | Cold Dry                                                                             | Cold Humid                                                                            |
| 400x          | 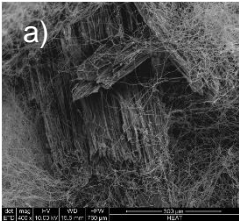   |    |    |    |
| 700x          |    |    |    |    |
| 2000x         |  |  |  |  |

**Figure S2.** SEM images of mycelium biocomposite at various magnifications across the four weathering conditions. a) Hot-dry at 400x b) Hot-humid at 400x c) Cold-dry at 400x d) Cold-humid at 400x e) Hot-dry at 700x f) Hot-humid at 700x g) Cold-dry at 700x h) Cold-humid at 700x i) Hot-dry at 2000x j) Hot-humid at 2000x k) Cold-dry at 2000x l) Cold-humid at 2000x.

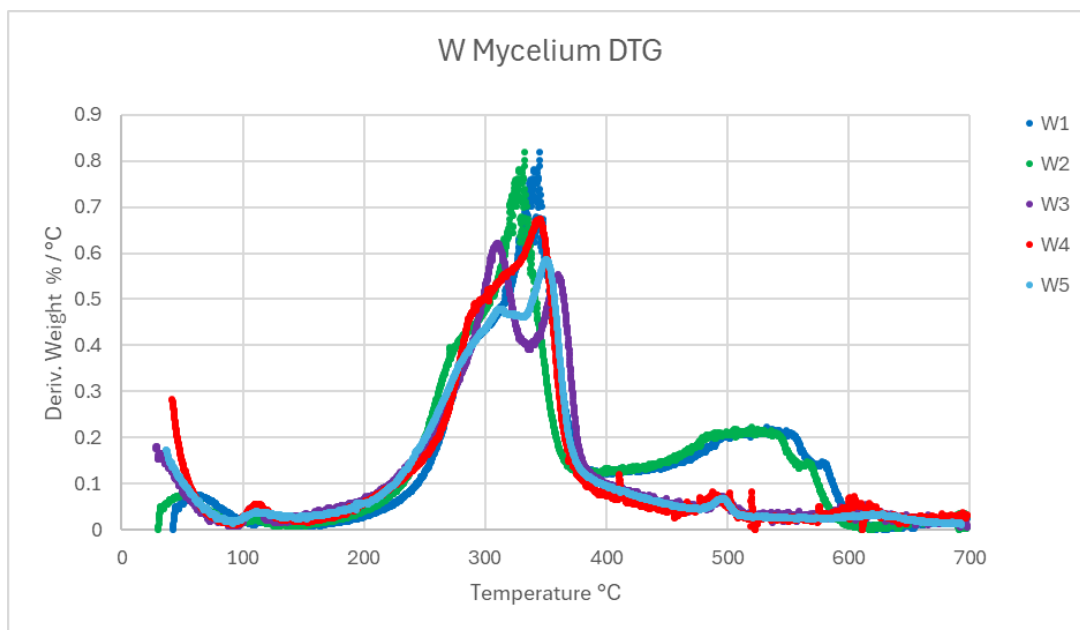

**Figure S3.** TGA thermogram derivative overlay of the mycelium coating: control (W1), hot-dry (W2), hot-humid (W3), cold-dry (W4), and cold-humid (W5).

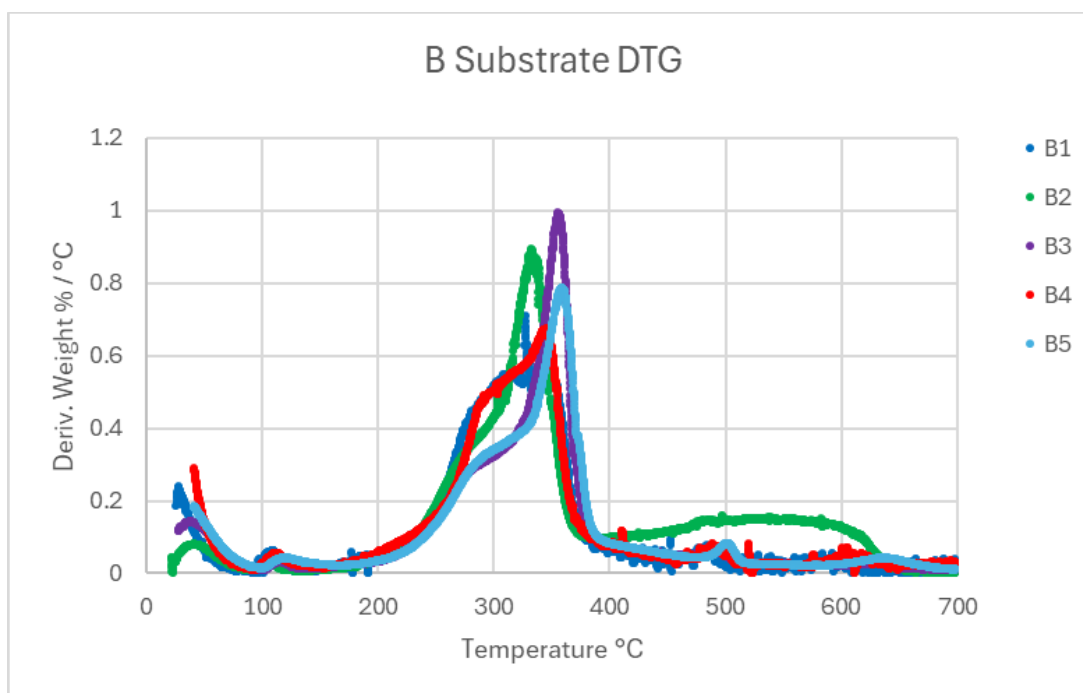

**Figure S4.** TGA thermogram derivative overlay of the mycelium substrate: control (W1), hot-dry (W2), hot-humid (W3), cold-dry (W4), and cold-humid (W5).
